# Supplementary material for: Aromatic cage-like B34 and B35+: new axially chiral members of the borospherene family
Source: Royal Society of Chemistry journal article supplement (doi:10.1039/c8cp01769g), 2018-01-01
Supplement: c8cp01769g1.pdf [file c8cp01769g1.pdf]

## Supporting Information

**Fig. S1** Thirty low-lying isomers of  $B_{34}$  with their relative energies (with zero-point corrections included) indicated in eV at PBE0/6-311+G(d), TPSSh/6-311+G(d) (in parenthesis) and CCSD(T)/6-31G(d) (in square brackets) levels.

(a)  $B_{34}$

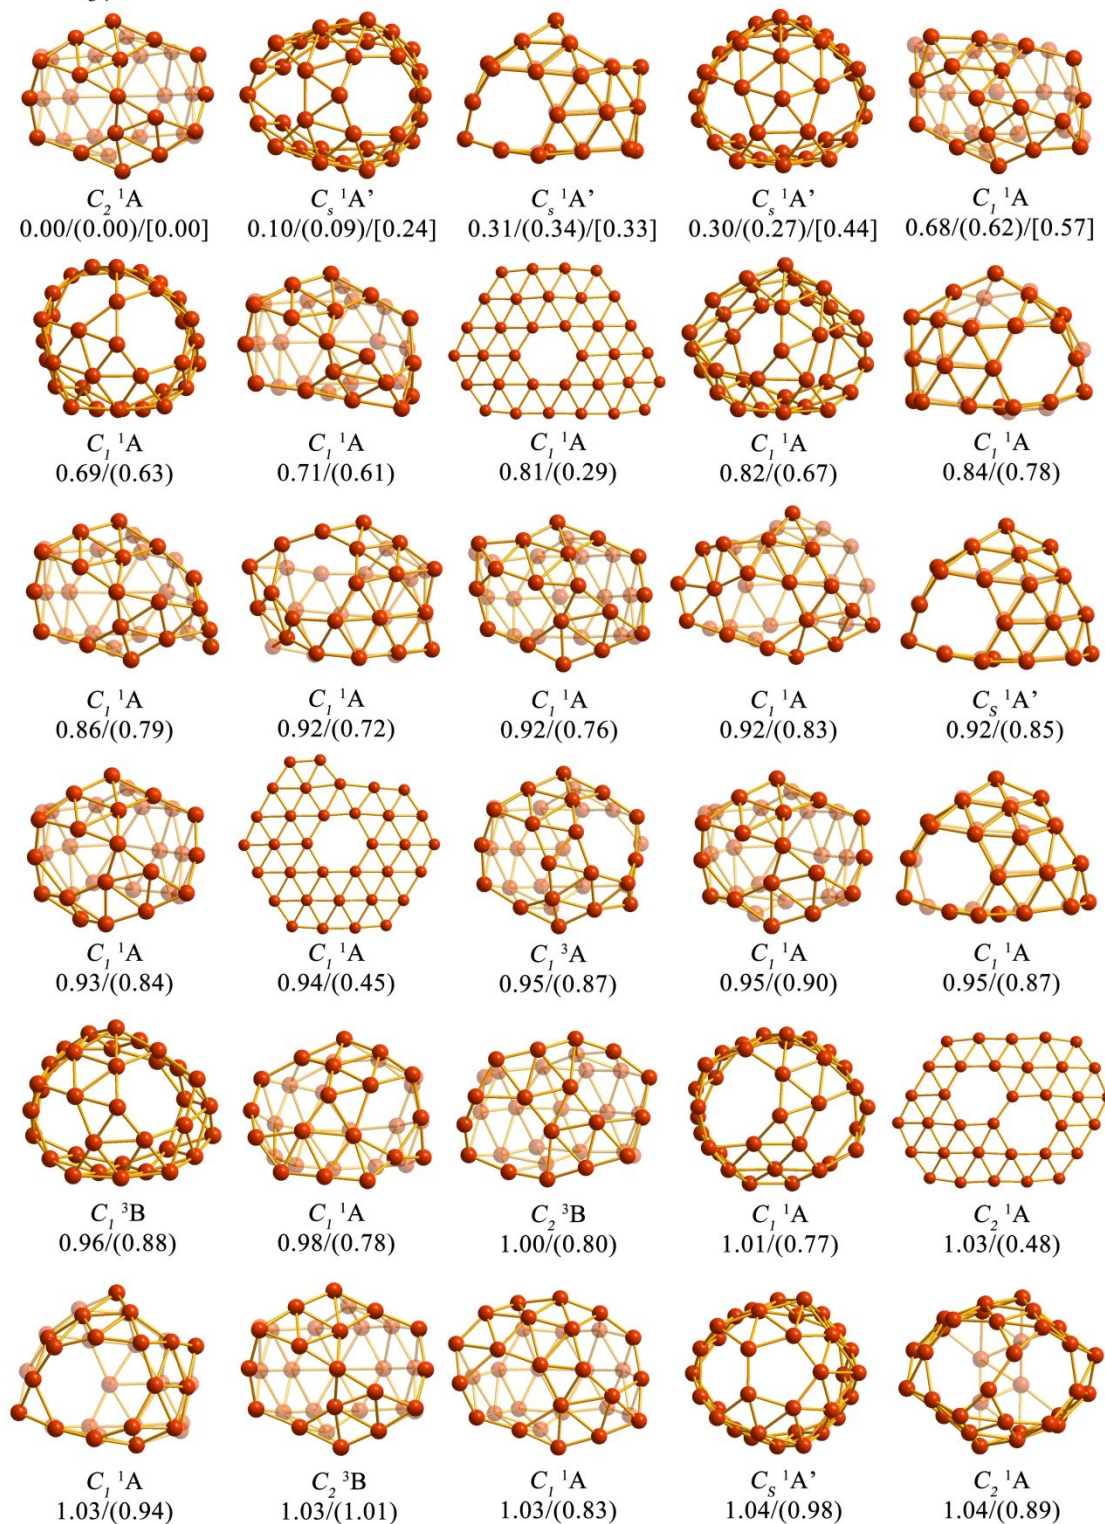

**Fig. S2** Thirty low-lying isomers of  $B_{35}^+$  with their relative energies (with zero-point corrections included) indicated in eV at PBE0/6-311+G(d), TPSSH/6-311+G(d) (in parenthesis) and CCSD(T)/6-31G(d) (in square brackets) levels.

(b)  $B_{35}^+$

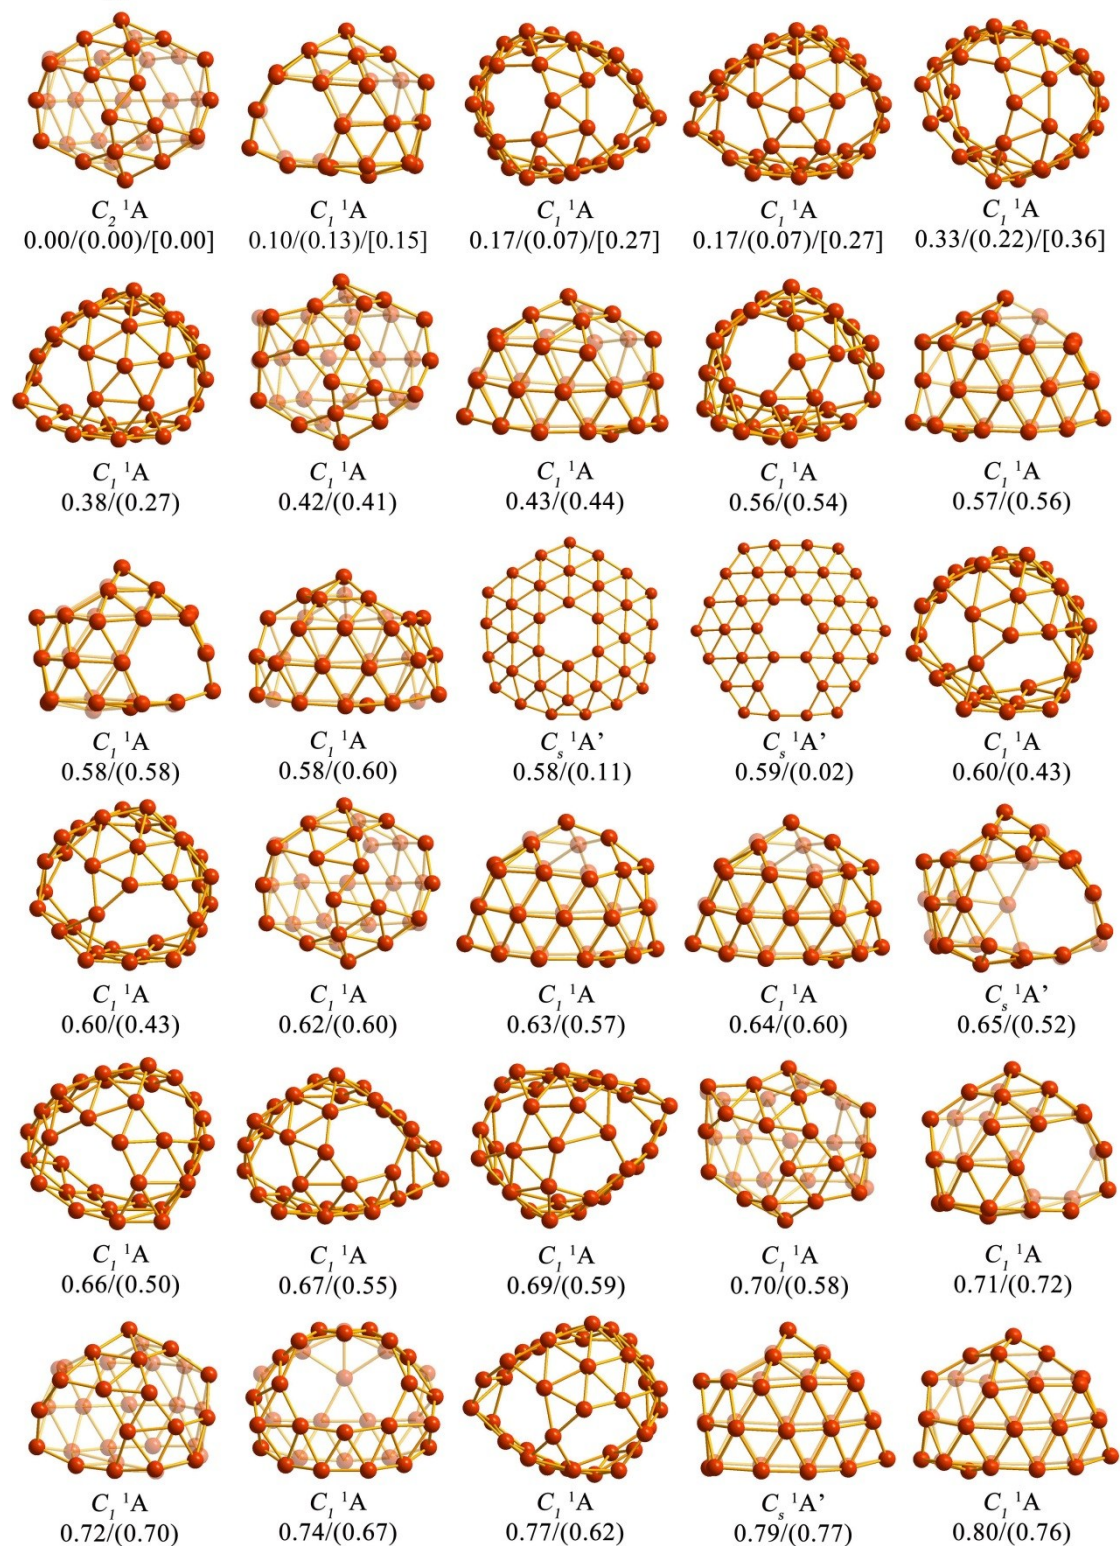



**Fig. S3** Born–Oppenheimer molecular dynamics simulations of  $C_2 B_{35}^+$  (1) at 1000K and 1100K. The root-mean-square-deviation (RMSD) and maximum bond length deviation (MAXD) values (on average) are indicated in Å.

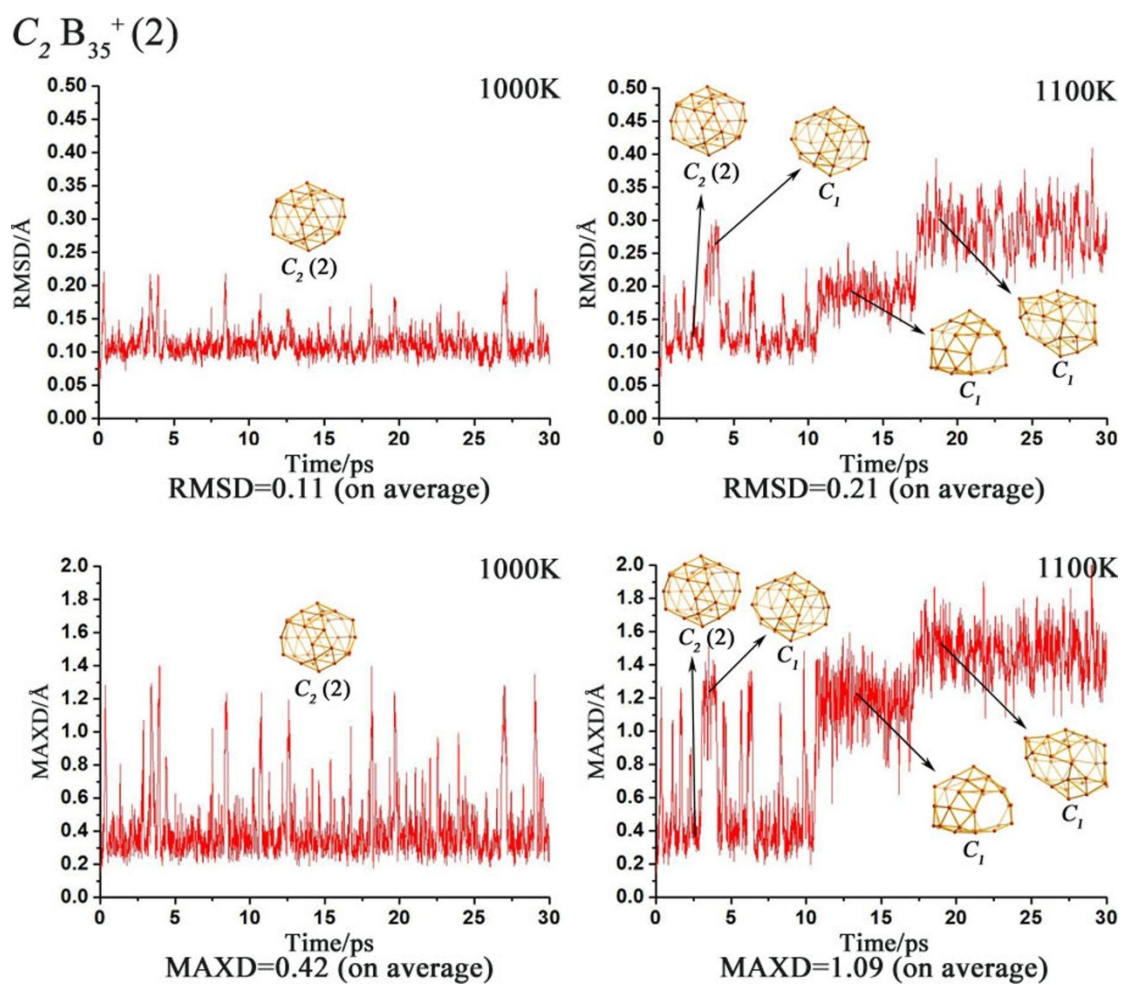

**Table S1** Optimized coordinates of  $C_2 B_{34}$  (1) and  $C_2 B_{35}^+$  (2) at PBE0/6-311+G(d).1.  $C_2 B_{34}$  (1)

|   |             |             |             |
|---|-------------|-------------|-------------|
| B | 1.17399900  | 2.31146900  | 1.29408300  |
| B | -2.31668600 | 0.99825700  | -1.00204400 |
| B | 0.81271100  | -1.49765900 | -1.94346800 |
| B | 2.41915600  | -0.22524900 | 0.59223300  |
| B | 2.31668600  | -0.99825700 | -1.00204400 |
| B | -0.05370200 | -1.56473400 | 2.39752100  |
| B | -1.67405200 | 0.06098700  | -2.27184800 |
| B | 2.05774700  | 0.70304100  | -0.80613200 |
| B | -0.81271100 | 1.49765900  | -1.94346800 |
| B | 0.00000000  | 0.00000000  | -2.37487500 |
| B | 0.05370200  | 1.56473400  | 2.39752100  |
| B | -1.52104400 | 2.78936900  | 1.01795800  |
| B | 0.08758900  | 2.74342800  | -1.42784900 |
| B | 0.00000000  | 3.10276000  | 0.17624600  |
| B | 0.94902900  | 1.38698800  | -1.90318600 |
| B | 1.52104400  | -2.78936900 | 1.01795800  |
| B | 2.32302800  | 1.39672000  | 0.64998800  |
| B | 2.66141500  | -1.88676100 | 0.31901300  |
| B | 0.00000000  | -3.10276000 | 0.17624600  |
| B | -0.16086400 | 3.06143800  | 1.81194200  |
| B | -1.32541300 | 2.36262800  | -0.62562200 |
| B | -1.17399900 | -2.31146900 | 1.29408300  |
| B | -2.41915600 | 0.22524900  | 0.59223300  |
| B | 1.20938600  | 0.53633200  | 1.58546000  |
| B | -2.05774700 | -0.70304100 | -0.80613200 |
| B | -2.66141500 | 1.88676100  | 0.31901300  |
| B | -0.08758900 | -2.74342800 | -1.42784900 |
| B | 1.67405200  | -0.06098700 | -2.27184800 |
| B | -1.20938600 | -0.53633200 | 1.58546000  |
| B | 0.00000000  | 0.00000000  | 2.64628400  |
| B | 1.32541300  | -2.36262800 | -0.62562200 |
| B | -2.32302800 | -1.39672000 | 0.64998800  |
| B | 0.16086400  | -3.06143800 | 1.81194200  |
| B | -0.94902900 | -1.38698800 | -1.90318600 |

2.  $C_2 B_{35}^+$  (2)

|   |             |             |             |
|---|-------------|-------------|-------------|
| B | -1.22120000 | 2.27548200  | -1.19993100 |
| B | 2.34144500  | 0.96541900  | 1.11212400  |
| B | -0.82015100 | -1.47892000 | 2.03227700  |
| B | -2.60252500 | -0.16734900 | -0.43359700 |
| B | -2.34144500 | -0.96541900 | 1.11212400  |
| B | 0.22967600  | -1.42679800 | -2.33264200 |
| B | 1.67455300  | 0.04025900  | 2.37290000  |
| B | -2.12375700 | 0.74870400  | 0.94165100  |
| B | 0.82015100  | 1.47892000  | 2.03227700  |
| B | 0.00000000  | 0.00000000  | 2.45346200  |
| B | -0.22967600 | 1.42679800  | -2.33264200 |
| B | 1.52095500  | 2.70121400  | -0.93185900 |
| B | -0.07558900 | 2.71517600  | 1.49646000  |
| B | 0.00000000  | 2.99071400  | -0.12124700 |
| B | -0.94049600 | 1.39727500  | 2.02889300  |
| B | -2.44716000 | 1.45459700  | -0.48560700 |
| B | -2.69383700 | -1.83654900 | -0.21947800 |
| B | 0.00000000  | -2.99071400 | -0.12124700 |
| B | 0.16176300  | 2.91101000  | -1.76264700 |
| B | 1.36492300  | 2.33230400  | 0.70855800  |
| B | 1.22120000  | -2.27548200 | -1.19993100 |
| B | 2.60252500  | 0.16734900  | -0.43359700 |
| B | -1.74293100 | 0.64296900  | -1.71709000 |
| B | 2.12375700  | -0.74870400 | 0.94165100  |
| B | 2.69383700  | 1.83654900  | -0.21947800 |
| B | 0.07558900  | -2.71517600 | 1.49646000  |
| B | -1.67455300 | -0.04025900 | 2.37290000  |
| B | 1.74293100  | -0.64296900 | -1.71709000 |
| B | 0.77639100  | 0.13628200  | -2.71549500 |
| B | -1.36492300 | -2.33230400 | 0.70855800  |
| B | 2.44716000  | -1.45459700 | -0.48560700 |
| B | -0.16176300 | -2.91101000 | -1.76264700 |
| B | 0.94049600  | -1.39727500 | 2.02889300  |
| B | -0.77639100 | -0.13628200 | -2.71549500 |
| B | -1.52095500 | -2.70121400 | -0.93185900 |
